# Supplementary material for: Epigenetic Dysregulation at the Crossroad of Women’s Cancer
Source: MDPI journal article supplement (doi:10.3390/cancers11081193), 2019-08-16
Supplement: s1 [file s1]

Supplementary Material

## Epigenetic Dysregulation at the Crossroad of Women's Cancer

Rakesh Kumar, Aswathy Mary Paul, Pranela Rameshwar and M. Radhakrishna Pillai

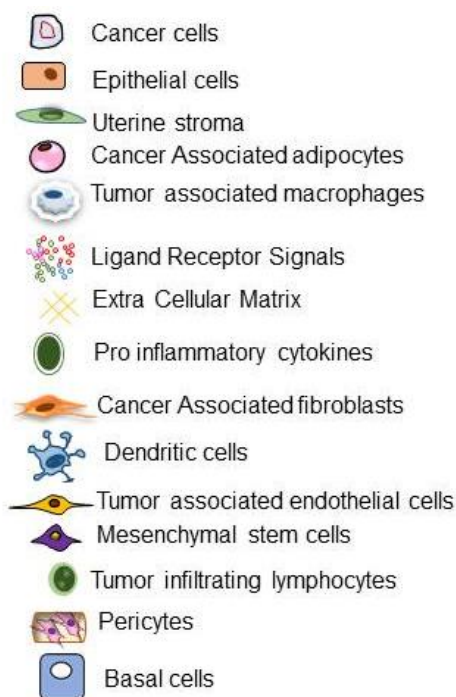

**Figure S1.** Representative components of the tumor microenvironment. (TME) illustrated in Figures 5a, 6a, and 7a.
